# Supplementary material for: Waste-heat harvesting using a thermoelectric generator coupled with a hygroscopic hydrogel for use in the energy industry
Source: Royal Society of Chemistry journal article supplement (doi:10.1039/d4tc04159c), 2024-11-19
Supplement: d4tc04159c1.pdf [file d4tc04159c1.pdf]

# Waste-heat Harvesting by Thermoelectric Generator Coupled with Hygroscopic Hydrogel in Energy Industry

Huangying WU <sup>a,b†</sup>, Guopeng CHEN <sup>b†</sup>, Shangzhen XIE <sup>b,c\*</sup>, Kang XIANG <sup>a,b</sup>, Yipeng FAN <sup>a,b</sup>, Zhiguang, GUO <sup>b,d\*</sup>

<sup>a</sup>School of Mechanical & Electrical Engineering, Wuhan Institute of Technology, Wuhan, China

<sup>b</sup>Ministry of Education Key Laboratory for the Green Preparation and Application of Functional Materials, Hubei University, Wuhan, China

<sup>c</sup> Department of Mechanical Engineering, City University of Hong Kong, Tat Chee Avenue, Kowloon Tong, Hong Kong 999077, China

<sup>d</sup> State Key Laboratory of Solid Lubrication, Lanzhou Institute of Chemical Physics, Chinese Academy of Sciences, Lanzhou, China

<sup>†</sup>The authors contribute equally

\*Corresponding authors' e-mail address: [priyawork@outlook.com](mailto:priyawork@outlook.com) (S.Xie); [zguo@licp.cas.cn](mailto:zguo@licp.cas.cn) (Z.Guo)

## Supplementary Note S1

Energy conversion efficiency of the system

The overall energy conversion efficiency of the system ( $\eta_{system}$ ) encompasses both the thermoelectric generator (TEG) conversion efficiency and the cooling effect of the hydrogel. The formula for calculating the TEG conversion efficiency is:

$$\eta_{system} = \frac{P_{out}}{Q_{in}}$$

where  $P_{out}$  represents the electrical power output of the TEG, and  $Q_{in}$  denotes the input power of the heating sheet, which can be 2W, 3W, or 4W, as these values correspond to the heat transferred to the TEG. Consequently, the integrated thermal management system proposed in this paper, utilizing a TEG of dimensions 40 mm x 40 mm (length x width), achieves energy conversion efficiency of 0.035%.

27 **Supplementary Note S2**

28 Repeated tests and infrared imaging

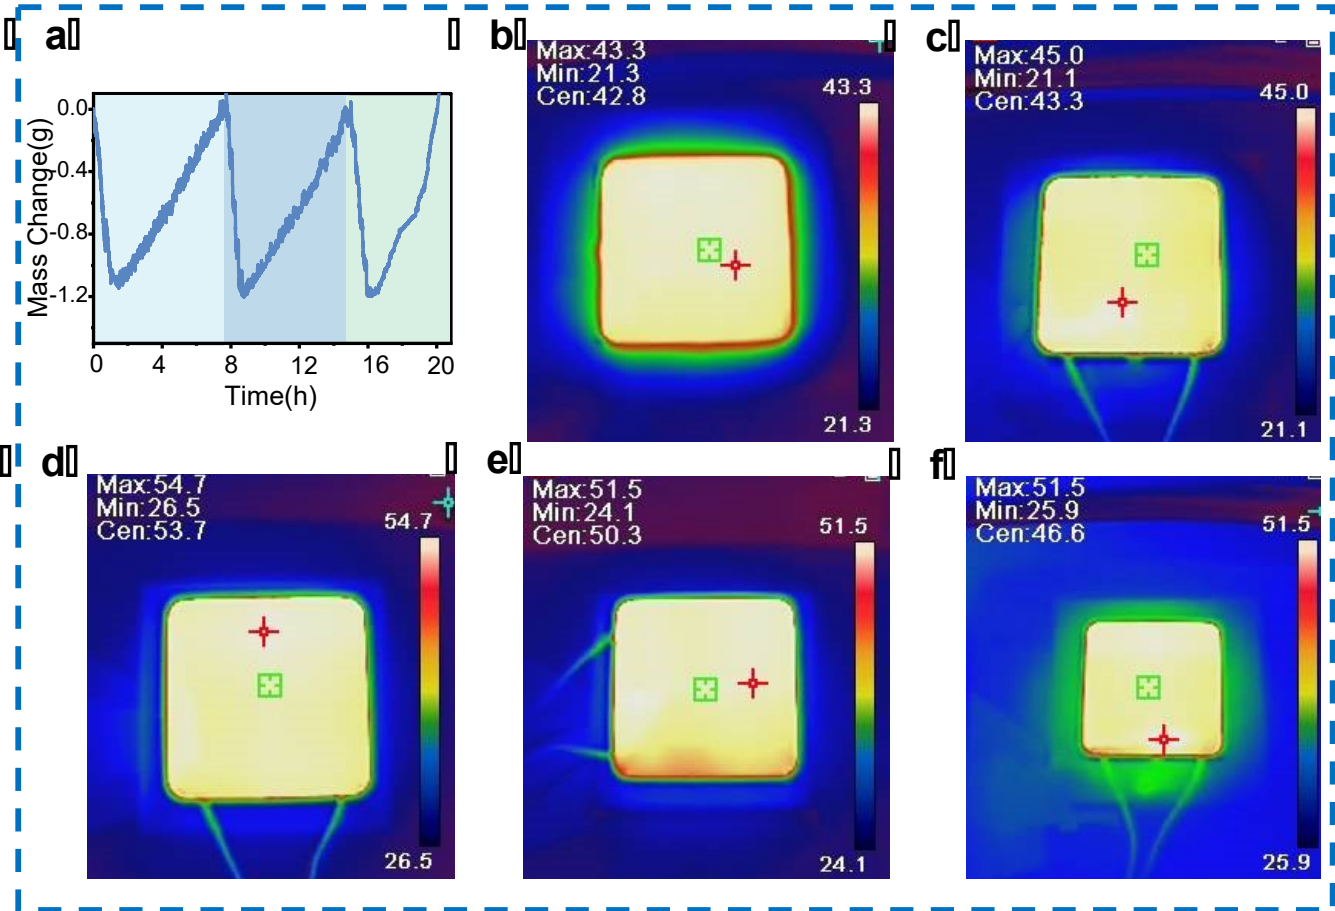

29 Fig.S1. The long-term stability of the hydrogel over multiple cycles and the infrared surface images. (a) Mass change  
30 of hygroscopic hydrogel during three cycles. (b)-(d) When the thickness of hydrogel is set as 5 mm, the surface  
31 temperature of TEGHT at different power inputs for the heat source. (c)(e)-(f) Under the input power of 3 W for the  
32 heat source, the surface temperature of the integrated system with different hydrogel thickness.

### 35 Supplementary Note S3

36 The integrated thermal management system designed for industrial application features an integrated and  
37 tilt-mountable fixed device.

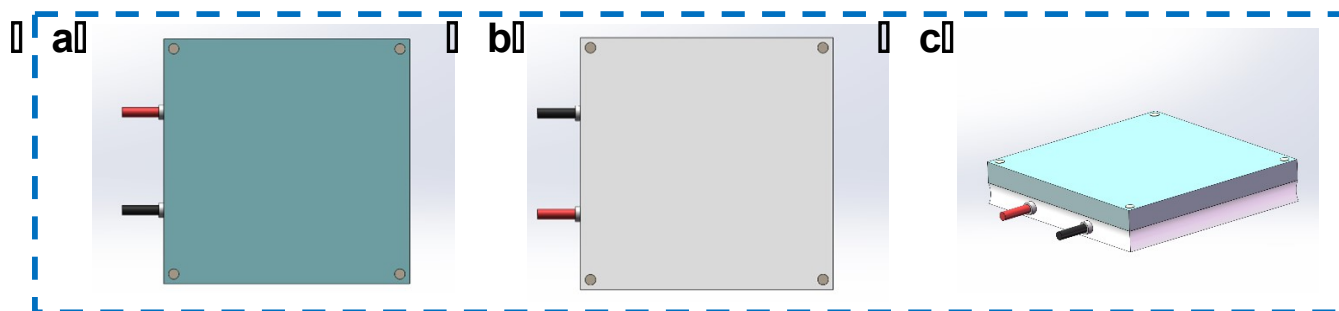

38  
39 Fig.S2. (a)Top view of the device. (b)Bottom view of the device. (c) Overall view of the device.

40

41 Hydrogels exhibit sustained structural integrity over extended periods of use, such as a duration of seven  
42 days.

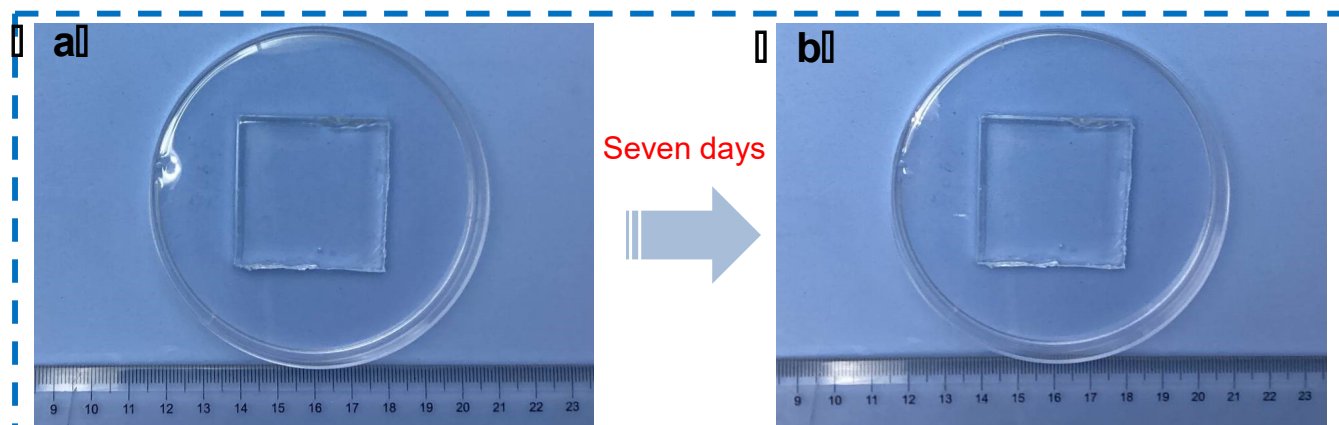

43  
44 Fig.S3. (a) Newly prepared hydrogel. (b) Hydrogel after a period of use.

45

46

47 **Supplementary Note S4**

48 The specific comparisons with existing thermal management systems in terms of cost, scalability, and  
49 performance are shown in Table S1.

50 Table S1 Cost, Scalability, and Performance Comparison

| Thermal Management System Type                                 | Performance Indicators                                                                                  | Cost                               | Scalability                                                                             |
|----------------------------------------------------------------|---------------------------------------------------------------------------------------------------------|------------------------------------|-----------------------------------------------------------------------------------------|
| 1D/2D Liquid Crystal Thermal Conductivity Network <sup>1</sup> | Reduces mobile CPU temperature by 3.4 °C                                                                | Relatively high cost               | Suitable for thermal management and waste heat recovery of electronic devices           |
| Anisotropic Graphene Film <sup>2</sup>                         | In-plane thermal conductivity of 81.2 W/mK, through-plane thermal conductivity of 5.1 W/mK              | Relatively high cost               | Mechanical flexibility, suitable for devices of irregular shapes                        |
| Millefeuille-Inspired PVA/BNNS Nanocomposites <sup>3</sup>     | In-plane thermal conductivity of 21.4 W/(m·K) (22.2 volume% BNNS addition)                              | Relatively low cost                | Scalable manufacturing methods, suitable for next-generation thermal management systems |
| Hygroscopic Composite Backplate <sup>4</sup>                   | Reduces the daily average temperature of photovoltaics by 1.5 to 6.4 °C                                 | Low cost, low raw material cost    | Flexible application for newly built or installed photovoltaic panels                   |
| TEG Coupled Hydrogel Integrated Thermal Management (This work) | Reduces the surface temperature of the heat source by 32 °C, output voltage of 0.20 V (3 W input power) | Low cost, environmentally friendly | Simple structure, flexible packaging, suitable for a variety of devices                 |

51

52

## 53 **Supplementary Note S5**

### 54 **Looking Forward**

55       To extend the applicability to industrial uses, enhance energy conversion efficiency, and achieve  
56 integration for improved system performance, future research can build upon the hygroscopic hydrogels  
57 presented in this study to develop materials with superior water absorption and retention capabilities. This  
58 advancement would further augment thermal management efficiency. Additionally, the development of  
59 novel environmentally responsive materials that can adapt to the diverse demands of industry is essential.  
60 Moreover, thermal interface materials (TIMs) play a pivotal role between heat sources and TEGs. In this  
61 study, a 0.5-millimeter-thick conductive silicone grease film was utilized. Future research could focus on  
62 the development of TIMs with higher thermal conductivity and improved thermal stability, which would  
63 reduce thermal contact resistance and enhance heat transfer efficiency, thereby facilitating their application  
64 in industrial settings.

65

### 66 **Reference**

- 67 1   Yang, B. et al. Thermal management and waste heat recovery of electronics enabled by highly thermoconductive  
68 aramid composites with bridge-type 1D/2D liquid-crystalline thermal conduction networks. *Energy Conversion and*  
69 *Management* **276**, (2023).
- 70 2   Yang, F., Song, Y., Li, Y. & Li, J. Anisotropic graphene films with improved thermal conductivity and flexibility  
71 for efficient thermal management. *Ceramics International* **49**, 23844-23850, (2023).
- 72 3   Chen, J., Wei, H., Bao, H., Jiang, P. & Huang, X. Millefeuille-Inspired Thermally Conductive Polymer  
73 Nanocomposites with Overlapping BN Nanosheets for Thermal Management Applications. *ACS Applied Materials*  
74 *& Interfaces* **11**, 31402-31410, (2019).
- 75 4   Li, Z. et al. A Hygroscopic Composite Backplate Enabling Passive Cooling of Photovoltaic Panels. *ACS Energy*  
76 *Letters* **8**, 1921-1928, (2023).

77
